# Supplementary material
Source: Springer Nature journal article supplement (https://www.springermedizin.de/resource/supplementary/12943_2013_1229_MOESM2_ESM.pdf/9553080)
Supplement: MOESM2 [file 9553080]

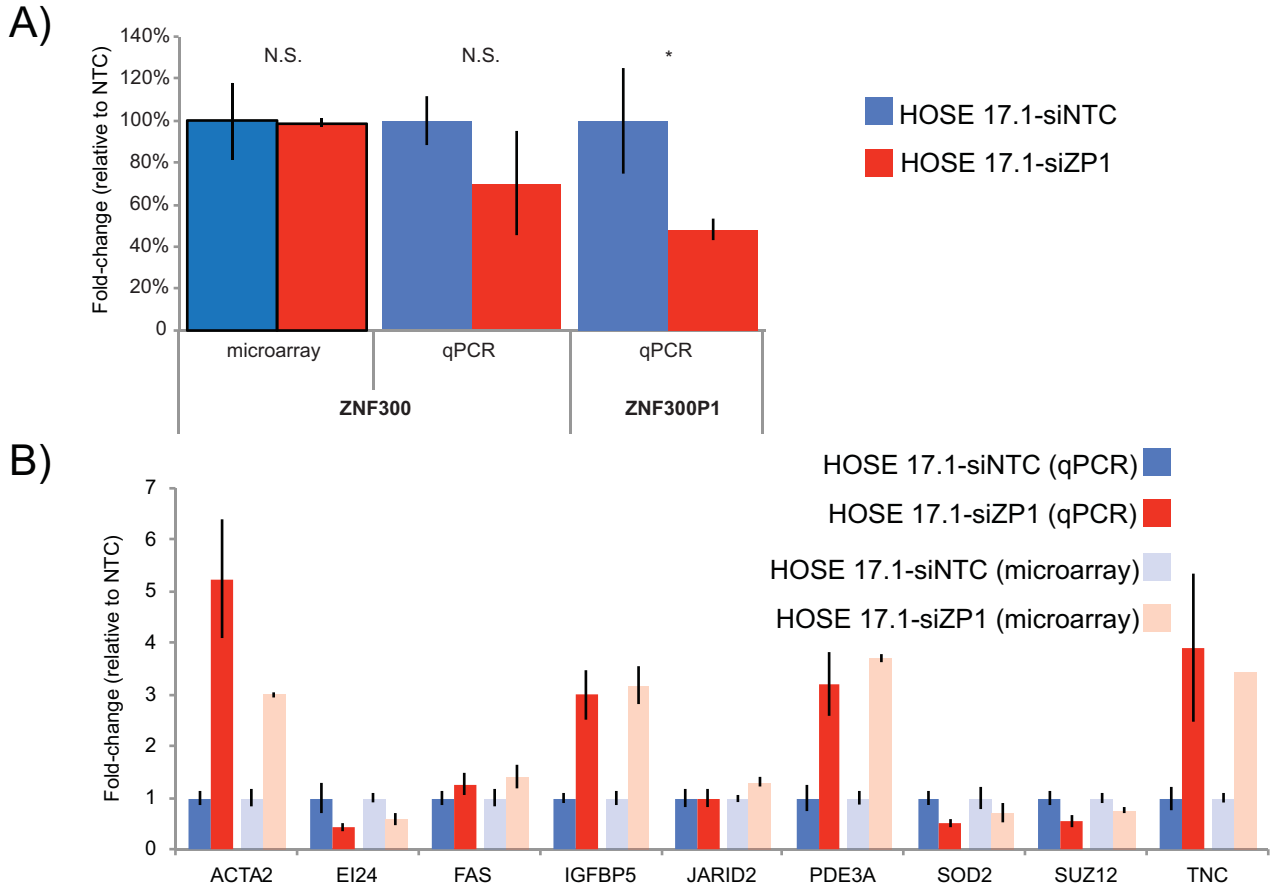

**C)** Network 1: Cell Cycle, DNA Replication, Recombination and Repair, Cell-to-Cell Signaling and Interaction

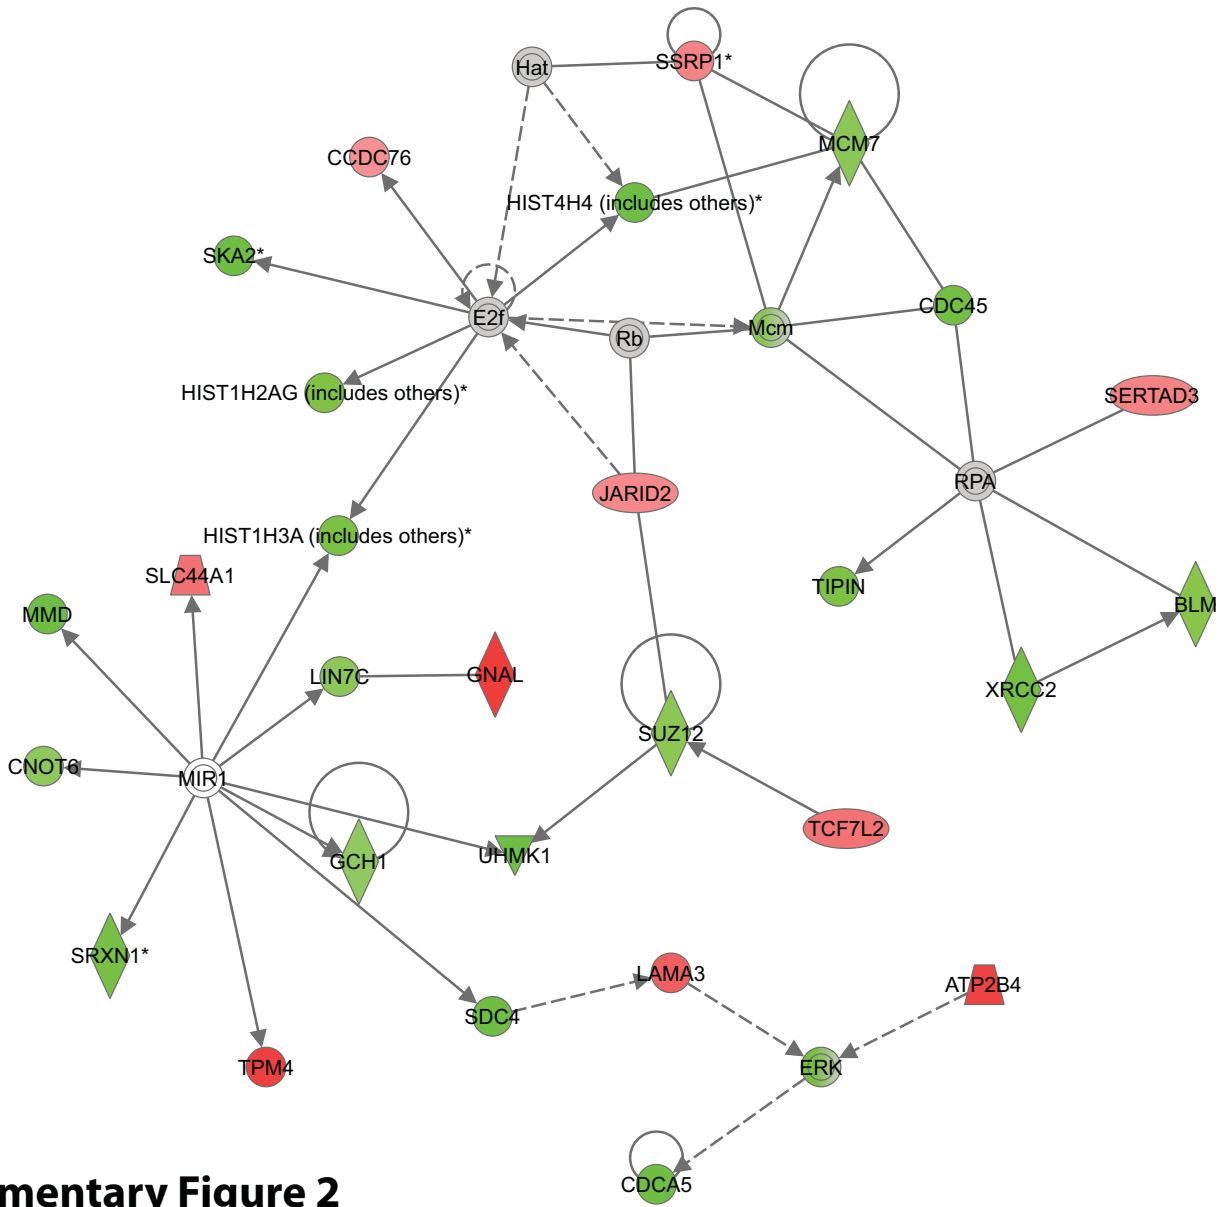

**Supplementary Figure 2**
